# Supplementary material
Source: publisher figshare collection journal article supplement (https://acs.figshare.com/ndownloader/files/10290330)

**One-step bioconversion of fatty acids into C8–C9 volatile aroma compounds by a multifunctional lipoxygenase cloned from *Pyropia haitanensis***

Zhu-Jun Zhu<sup>1,2</sup>, Hai-Min Chen<sup>1,\*</sup>, Juan-Juan Chen<sup>1</sup>, Rui Yang<sup>1</sup>, Xiao-Jun Yan<sup>1,\*</sup>

1 Key Laboratory of Marine Biotechnology of Zhejiang Province, Ningbo University, Ningbo, Zhejiang, 315211, China.

2 Ningbo Institute of Oceanography, Ningbo, Zhejiang, 315832, China.

\* Corresponding authors

### **Supporting Information Table of Contents**

1. **Figure S1** – GC-MS analysis of the VOCs composition of hydrolyzed sunflower seed oil by incubation with PhLOX.
2. **Figure S2** – GC-MS analysis of the VOCs composition of hydrolyzed corn oil by incubation with PhLOX.
3. **Figure S3** – GC-MS analysis of the VOCs composition of hydrolyzed fish oil by incubation with PhLOX.
4. **Figure S4** – GC-MS analysis of VOCs generated from different fatty acids after incubation with PhLOX. Here the second column (AgilentHP-5MS, 30 m  $\times$  0.25 mm  $\times$  0.25  $\mu$ m) was used to separate and analyze the volatile products.
5. **Figure S5** – GC-MS analysis of the VOCs generated from hydrolyzed oils after incubation with PhLOX. Here the second column (AgilentHP-5MS, 30 m  $\times$  0.25 mm  $\times$  0.25  $\mu$ m) was used to separate and analyze the volatile products.

**Figure S1** GC-MS analysis of the VOCs composition of hydrolyzed sunflower seed oil by incubation with PhLOX. C1–C10 represent compounds tentatively identified as 3-pentanone, 2-hexanone, hexanoic acid methyl ester, glycerin, undecane, octanoic acid methyl ester, dodecane, 4,6-dimethyl-dodecane, decanoic acid methyl ester and dodecanoic acid methyl ester, respectively. I1–I2 represent compounds tentatively identified as *n*-nonanal and *n*-decanal. N1–N7 represent compounds tentatively identified as 2*E*,4*E*-pentadienal, 2*E*-hexenal, *n*-heptanal, 2*E*-heptenal, *n*-octanal, 2*E*-octenal and 2*E*,4*E*-nonadienal, respectively. IS represents the vanillin internal standard.

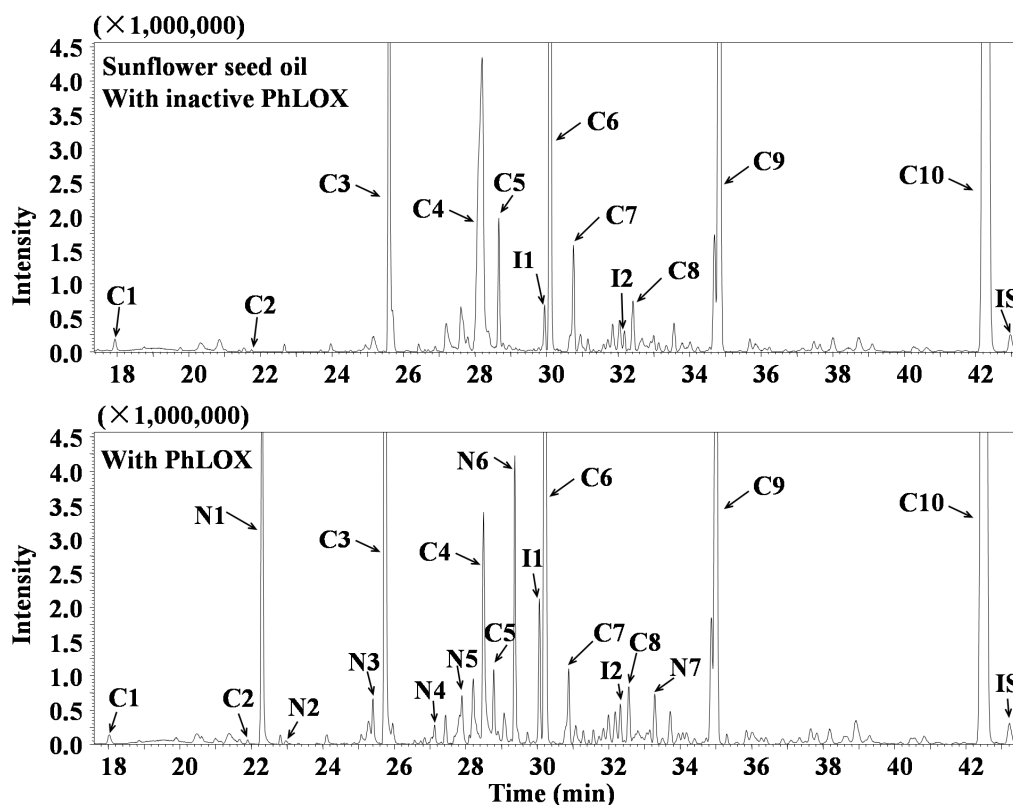

**Figure S2** GC-MS analysis of the VOCs composition of hydrolyzed corn oil by incubation with PhLOX. C1–C12 represent compounds tentatively identified as 3-pentanone, 3-hexanone, 2-hexanone, hexanoic acid methyl ester, glycerin, 1H-imidazole, undecane, octanoic acid methyl ester, dodecane, 4,6-dimethyl-dodecane, decanoic acid methyl ester and dodecanoic acid methyl ester, respectively. N1–N7 represent compounds tentatively identified as 2*E*,4*E*-pentadienal, 2*E*-hexenal, *n*-heptanal, 2*E*-heptenal, *n*-octanal, 2*E*-octenal and 2*E*,4*E*-nonadienal, respectively. I1–I2 represent compounds tentatively identified as *n*-nonanal and *n*-decanal. IS represents the vanillin internal standard.

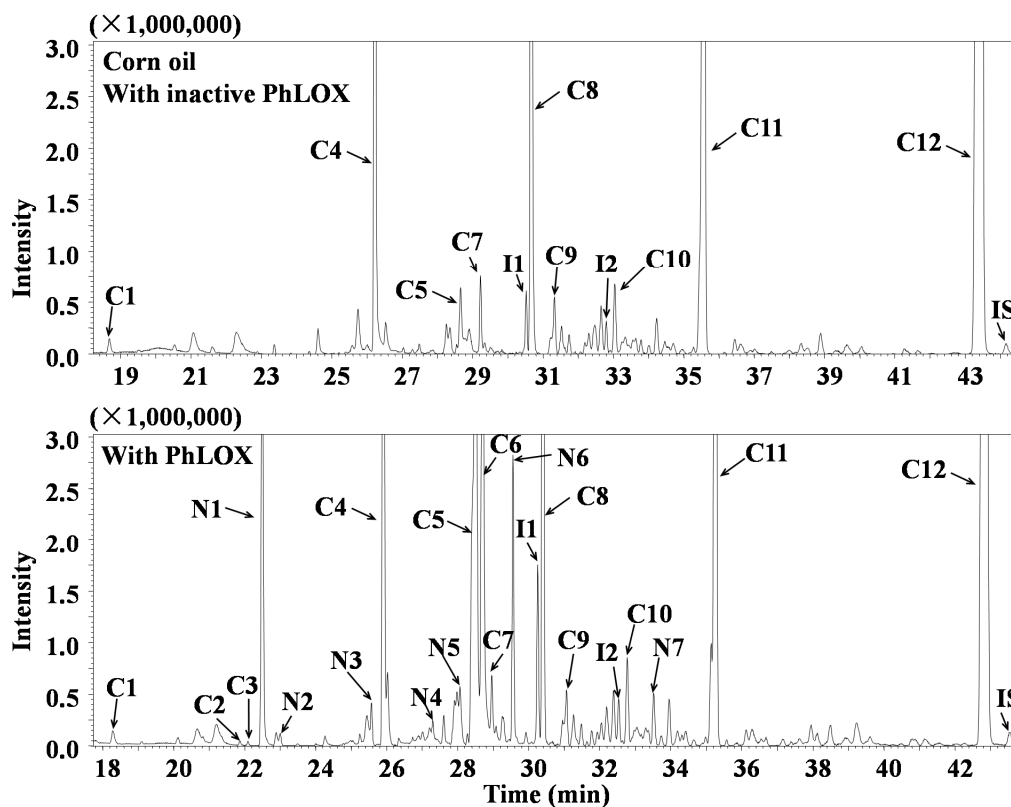

**Figure S3** GC-MS analysis of the VOCs composition of hydrolyzed fish oil by incubation with PhLOX. C1–C11 represent compounds tentatively identified as 3-pentanone, 3-hexanone, 2-hexanone, hexanoic acid methyl ester, glycerin, 1H-imidazole, octanoic acid methyl ester, 4,6-dimethyl-dodecane, 2,4-dimethyl-benzaldehyde, decanoic acid methyl ester and dodecanoic acid methyl ester, respectively. X1–X2 represent compounds tentatively identified as triethylmethoxy silane and diethoxydimethyl silane. N1–N11 represent compounds tentatively identified as 2*E*,4*E*-pentadienal, 2*E*-hexenal, 4*Z*-heptenal, 1-hepten-3-ol, *n*-octanal, 2*E*-octen-1-ol, 2*E*-octenal, 3*E*,5*E*-octadien-2-one, 2*E*,4*E*-octadienal, 2*E*,6*Z*-nonadienal and 2*E*,4*Z*-decadienal, respectively. I1–I2 represent compounds tentatively identified as *n*-nonanal and *n*-decanal. IS represents the vanillin internal standard.

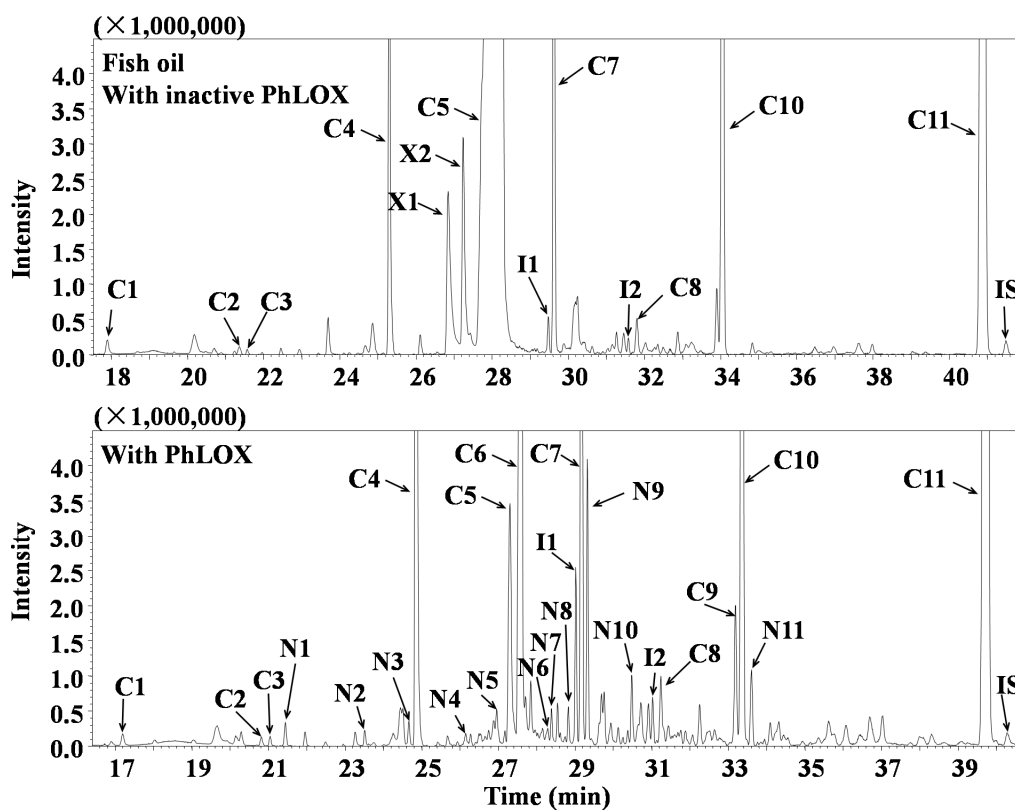

**Figure S4** – GC-MS analysis of VOCs generated from different fatty acids after incubation with PhLOX. Here the second column (AgilentHP-5MS, 30 m × 0.25 mm × 0.25 μm) was used to separate and analyze the volatile products. Compounds marked as C1-C10 tentatively identified as diethoxydimethyl silane, 1H-imidazole, 2,4-dimethylundecane, hexane, cyclooctyl alcohol, 1-tetradecen-3-yne, hexadecane, pentanoic acid methyl ester, hexanoic acid methyl ester and octamethylcyclotetrasiloxane, respectively.

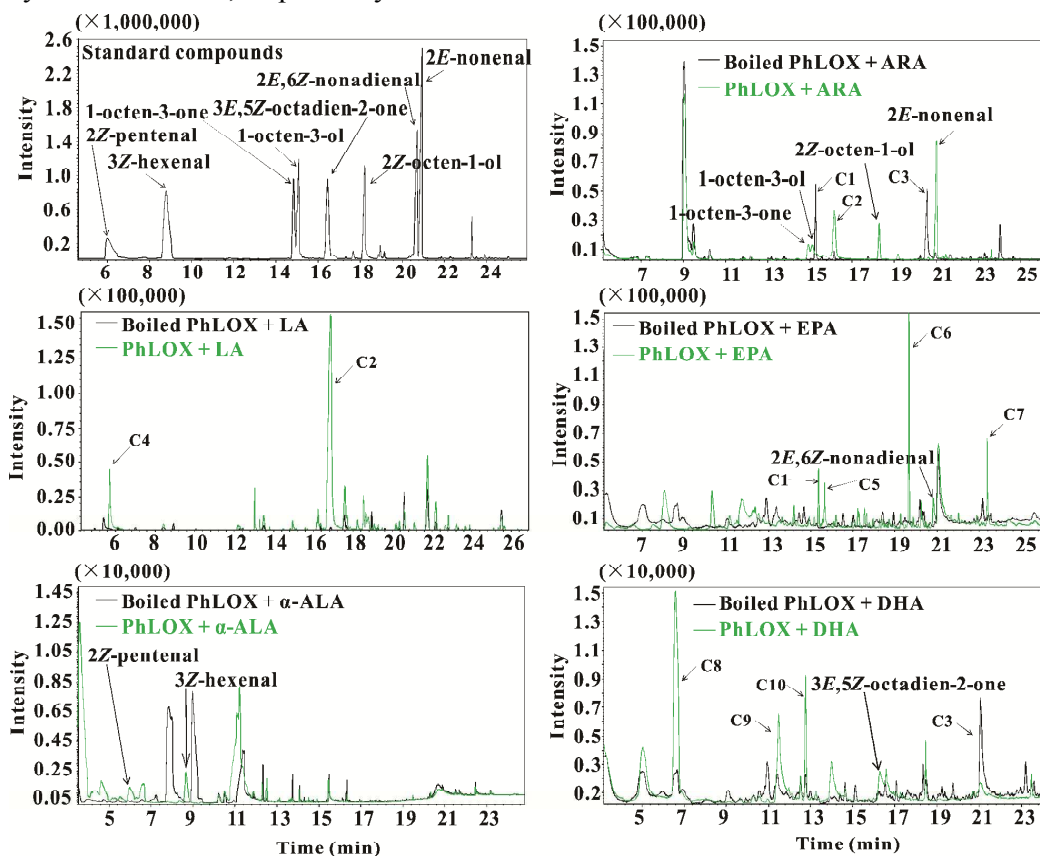

**Figure S5** – GC-MS analysis of the VOCs generated from hydrolyzed oils after incubation with PhLOX. Here the second column (AgilentHP-5MS, 30 m × 0.25 mm × 0.25 μm) was used to separate and analyze the volatile products. Compounds marked as N1–N14 tentatively identified as 2*E*,4*E*-pentadienal, *n*-heptanal, 2*E*-heptenal, *n*-octanal, 2*E*-octenal, 2*E*,4*E*-nonadienal, 2*E*-hexenal, 4*Z*-heptenal, 1-hepten-3-ol, 2*E*,4*E*-octadienal, 2*E*-octenal, *n*-octanal, 3*E*,5*E*-octadien-2-one and 2*E*,6*Z*-nonadienal, respectively.

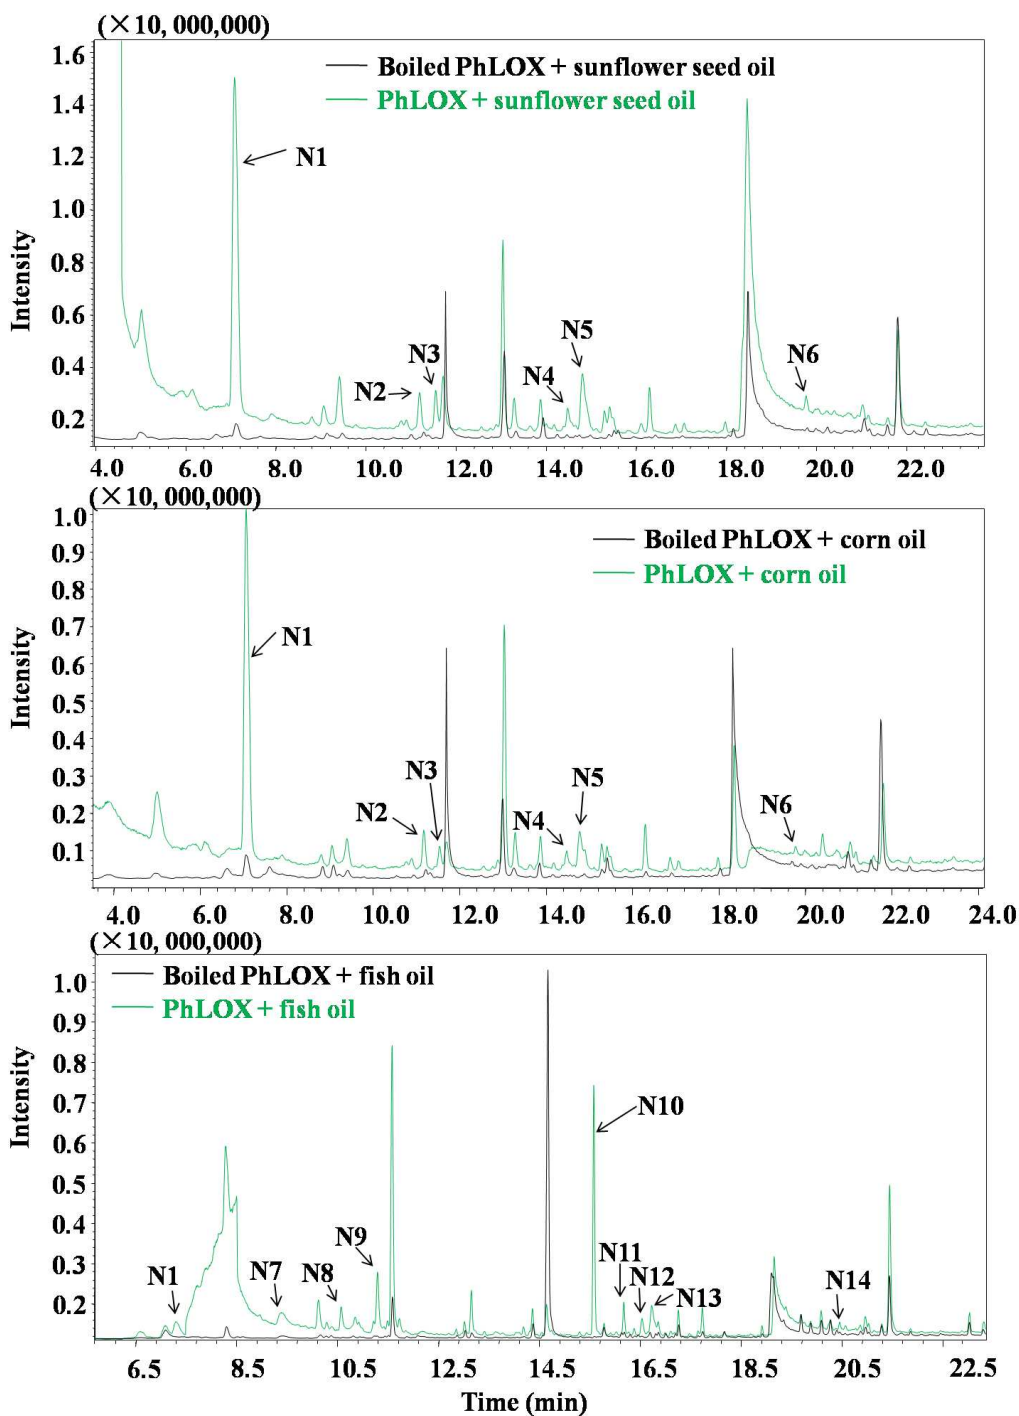

Supplement: Supplementary file 1 [file 10290330]
